# Supplementary material for: Household cooking fuel use and its health effects among rural women in southern India—A cross-sectional study
Source: PubMed Central journal article supplement (PMC7185712; doi:10.1371/journal.pone.0231757), 2020-04-27
Supplement: pone.0231757.s001.pdf [file pone.0231757.s001.pdf]

## MAIN QUESTIONNAIRE

### A. GENERAL INFORMATION –

A1. Family ID: \_\_\_\_\_

A2. Locality: \_\_\_\_\_

A3. Socioeconomic status: High/Medium/Low

A4. Religion: \_\_\_\_\_

A5. Total income of the family: \_\_\_\_\_

### B. COOKING PRACTICES

B1. Where do you cook usually?

- a) In a room used for living or sleeping (with partition)
- b) In a room used for living or sleeping (without partition)
- c) In a separate room used as kitchen
- d) In a separate building used as kitchen
- e) Outdoors

B2. Describe the use of each stove in the house

| Purpose-Currently used                 | Most importantly used stove * | Second most commonly used stove * | Average hours of use (most important stove) | Average hours of use (Second most important stove) |
|----------------------------------------|-------------------------------|-----------------------------------|---------------------------------------------|----------------------------------------------------|
| Cooking for home                       |                               |                                   |                                             |                                                    |
| Cooking food/drink for selling outside |                               |                                   |                                             |                                                    |
| Heating water                          |                               |                                   |                                             |                                                    |
| Cooking animal feed                    |                               |                                   |                                             |                                                    |

- \* a) Biomass portable open stoves without chimney  
 b) Biomass fixed open stove without chimney  
 c) Biomass portable stove with chimney  
 d) Biomass fixed stove with chimney  
 e) Kerosene Stove  
 f) LPG stove  
 g) others

B3. How long does it take to cook one meal?

- a) Breakfast \_\_\_\_\_
- b) Lunch \_\_\_\_\_
- c) Dinner \_\_\_\_\_
- d) Others (Specify) \_\_\_\_\_

## C FUEL USE

C1. What type of fuel do you use for the following purposes?

| Purpose                                | Fuel used * |       | Duration of usage in years |       | Average use in hours |       | Reason for using the fuel** |       |
|----------------------------------------|-------------|-------|----------------------------|-------|----------------------|-------|-----------------------------|-------|
|                                        | Fuel1       | Fuel2 | Fuel1                      | Fuel2 | Fuel1                | Fuel2 | Fuel1                       | Fuel2 |
| Cooking for home                       |             |       |                            |       |                      |       |                             |       |
| Cooking food/drink for selling outside |             |       |                            |       |                      |       |                             |       |
| Heating water                          |             |       |                            |       |                      |       |                             |       |
| Cooking animal feed                    |             |       |                            |       |                      |       |                             |       |

- \*a) Wood (logs)      b) Crop Residues      c) Dung Cakes      d) Coal  
 e) Charcoal      f) Kerosene      g) LPG      h) Bio-Gas  
 i) Electricity      j) Solar cooker      k) Others \_\_\_\_\_

- \*\*a) More affordable      b) Easily available      c) The fuel is of better quality  
 d) The fuel produces less smoke      e) Takes lesser time to cook  
 f) Others \_\_\_\_\_

C2a. Do you use kerosene lamps? Yes/No

C2b. For how long have you been using kerosene lamps? \_\_\_\_\_

C3. After use of biomass, what is the method of disposal preferred?

- a) Dumping
- b) Controlled tipping or sanitary land fill
- c) Incineration
- d) Composting
- e) Burial
- f) Municipality bins

C4. Does the household ever changed its fuel use pattern? Yes/ No

C5. If yes the fuel changed from \_\_\_\_\_ to \_\_\_\_\_.

C6. The reason for change : \_\_\_\_\_

## D. HABITS

D1a. Does anyone smoke in your household? Yes / No

D1b. List the people who smoke in the family, the number of cigarettes/bidis and for how many years

| Sl.no | Household member | Number of cigarettes/day | Duration (Years) | Number of bidis/day | Duration |
|-------|------------------|--------------------------|------------------|---------------------|----------|
| 1     |                  |                          |                  |                     |          |
| 2     |                  |                          |                  |                     |          |
| 3     |                  |                          |                  |                     |          |
| 4     |                  |                          |                  |                     |          |
| 5     |                  |                          |                  |                     |          |
| 6     |                  |                          |                  |                     |          |

D2. Where do you and/or other family members (if any) primarily smoke?

- a) Inside the house
- b) Outside the house
- c) Both inside and outside the house
- d) Other \_\_\_\_\_

D3a. Do you burn incense sticks in your house? Yes /No

D3b. How many incense sticks do you burn per day? \_\_\_\_\_

D4a. Do you burn mosquito coils in your house? Yes/No

D4b. How many mosquito coils do you burn per day? \_\_\_\_\_

## E. HOUSING CHARACTERISTICS

E1. Type of house

- a) Kucha
- b) Pucca
- c) Mixed

E2. Is there overcrowding present in the household? Yes/No

E3. How is the ventilation of the house?

- a) Adequate
- b) Inadequate

E4. How is the lighting of the house?

- a) Adequate
- b) Inadequate

## F. KITCHEN / COOKING AREA CHARACTERISTICS

F1. Kitchen/cooking area dimensions:

- a) Length: \_\_\_\_\_ feet
- b) Width: \_\_\_\_\_ feet
- c) Height: \_\_\_\_\_ feet

F2. How is the ventilation of the kitchen?

- a) Adequate
- b) Inadequate

F3. How is the lighting of the kitchen?

- a) Adequate
- b) Inadequate

F4. Type of permanent ventilation present in the cooking area/kitchen?

- a) Gaps in between roof and the wall
- b) Windows
- c) No ventilation

F5. Are the windows open while cooking? Yes/No

F6. Are the doors open while cooking? Yes/No

F7. Is there a smoke outlet /exhaust fan present in the kitchen? Yes/No

F8. Is the open air kitchen enclosed on all sides? Yes/No

## **G. HEALTH STATUS**

G1. Does anyone in the family suffer from tuberculosis? Yes/No

G2. Have they received medical treatment for tuberculosis? Yes/No

G3. If yes, what was the outcome?

- a) Declared cured
- b) Failure
- c) Incomplete treatment
- d) Relapse

## QUESTIONNAIRE

### A.GENERAL INFORMATION

A1.Individual ID \_\_\_\_\_

A2.Age:\_\_\_\_\_

A3.Literacy status:\_\_\_\_\_

A4.Occupation:\_\_\_\_\_

A5. Cooking status:

- a) Involved in cooking at present
- b) Not involved in cooking at present but at past have been involved in cooking
- c) Exposed to cooking fuel use but never involved in cooking

A6. At what age did you start cooking? \_\_\_\_\_

A7.For how long have you been cooking? \_\_\_\_\_

A8.Which type of fuel you have been using since the time you started cooking?

| Purpose                                | Fuel used * |       | Duration of usage in years |       | Average use in hours |       | Reason for using the fuel** |       |
|----------------------------------------|-------------|-------|----------------------------|-------|----------------------|-------|-----------------------------|-------|
|                                        | Fuel1       | Fuel2 | Fuel1                      | Fuel2 | Fuel1                | Fuel2 | Fuel1                       | Fuel2 |
| Cooking for home                       |             |       |                            |       |                      |       |                             |       |
| Cooking food/drink for selling outside |             |       |                            |       |                      |       |                             |       |
| Heating water                          |             |       |                            |       |                      |       |                             |       |
| Cooking animal feed                    |             |       |                            |       |                      |       |                             |       |

- \*a) Wood (logs)      b) Crop Residues      c) Dung Cakes      d) Coal  
 e) Charcoal      f) Kerosene      g) LPG      h) Bio-Gas  
 i) Electricity      j) Solar cooker      k) Others \_\_\_\_\_

- \*\*a) More affordable      b) Easily available      c) The fuel is of better quality  
 d) The fuel produces less smoke      e) Takes lesser time to cook  
 f) Others \_\_\_\_\_

A9a.Do you use kerosene lamps?

Yes/No

A9b.For how long have you been using kerosene lamps?

\_\_\_\_\_

## B.HEALTH STATUS

| Sl. no | Disease/<br>Symptom                  | Have you<br>experienced the<br>disease<br>/symptoms<br>? | Frequency<br>of episodes<br>per year | Duration | Received<br>treatment | Was<br>hospitalization<br>required<br>any time? |
|--------|--------------------------------------|----------------------------------------------------------|--------------------------------------|----------|-----------------------|-------------------------------------------------|
| 1      | Diminished<br>vision                 | Yes/No                                                   |                                      |          | Yes/No                | Yes/No                                          |
| 2      | Cataract                             | Yes/No                                                   |                                      |          | Yes/No                | Yes/No                                          |
| 3      | Throat irritation                    | Yes/No                                                   |                                      |          | Yes/No                | Yes/No                                          |
| 4      | Eye irritation                       | Yes/No                                                   |                                      |          | Yes/No                | Yes/No                                          |
| 5      | Watering of<br>eyes                  | Yes/No                                                   |                                      |          | Yes/No                | Yes/No                                          |
| 6      | Skin<br>Burns/Blisters               | Yes/No                                                   |                                      |          | Yes/No                | Yes/No                                          |
| 7      | Skin irritation                      | Yes/No                                                   |                                      |          | Yes/No                | Yes/No                                          |
| 8      | Ear pain                             | Yes/No                                                   |                                      |          | Yes/No                | Yes/No                                          |
| 9      | Cardiovascular<br>diseases           | Yes/No                                                   |                                      |          | Yes/No                | Yes/No                                          |
| 10     | Hypertension                         | Yes/No                                                   |                                      |          | Yes/No                | Yes/No                                          |
| 11     | Asthma                               | Yes/No                                                   |                                      |          | Yes/No                | Yes/No                                          |
| 12     | Chronic<br>bronchitis                | Yes/No                                                   |                                      |          | Yes/No                | Yes/No                                          |
| 13     | Cough without<br>phlegm              | Yes/No                                                   |                                      |          | Yes/No                | Yes/No                                          |
| 14     | Cough with<br>phlegm                 | Yes/No                                                   |                                      |          | Yes/No                | Yes/No                                          |
| 15     | Nasal<br>Stuffiness/<br>Running nose | Yes/No                                                   |                                      |          | Yes/No                | Yes/No                                          |
| 16     | Others<br>_____                      | Yes/No                                                   |                                      |          | Yes/No                | Yes/No                                          |
|        | —                                    |                                                          |                                      |          |                       |                                                 |

|                                                                                            |            |
|--------------------------------------------------------------------------------------------|------------|
| B19a. Do/ Did you suffer from tuberculosis?                                                | Yes/No     |
| B19b. If yes, have you received medical treatment for tuberculosis?                        | Yes/No     |
| B19c. If yes, what was the outcome?                                                        |            |
| a) Declared cured                                                                          |            |
| b) Failure                                                                                 |            |
| c) Incomplete treatment                                                                    |            |
| d) Relapse                                                                                 |            |
| <br>B20. How many children do you have?                                                    | <br>_____  |
| <br>B21a. Do you have a history of miscarriages?                                           | <br>Yes/No |
| B21b. How many miscarriages did you have?                                                  | _____      |
| B21c. At which month did you have the miscarriage?                                         | _____      |
| <br>B22a. Do you have a history of still births?                                           | <br>Yes/No |
| B22b. How many stillbirths did you have?                                                   | _____      |
| B22c. At what month did you have stillbirth?                                               | _____      |
| <br>B23a. Did your children have a history of IUGR at time of pregnancy?                   | <br>Yes/No |
| B23b. How many children had a history of IUGR?                                             | _____      |
| <br>B24a. Did your children have a history of low birth weight at time of delivery? Yes/No |            |
| B24b. How many children had a history of low birth weight?                                 | _____      |
| B24c. What was the birth weight of the child?                                              | _____      |
| <br>B25a. Did you have a preterm delivery?                                                 | <br>Yes/No |
| B25b. How many children were born preterm?                                                 | _____      |
| B25c. At what month was your child born preterm?                                           | _____      |
